1 **ARTICLE TITLE:**

2 Efficacy and Safety of 5-Day Oral Ensitrelvir for Patients With Mild-to-Moderate COVID-19:  
3 The SCORPIO-SR Randomized Clinical Trial

4

5 **AUTHORS:**

6 Hiroshi Yotsuyanagi, M.D., Ph.D.,<sup>1</sup> Norio Ohmagari, M.D., Ph.D.,<sup>2</sup> Yohei Doi, M.D., Ph.D.,<sup>3,4</sup>

7 Masaya Yamato, M.D., Ph.D.,<sup>5</sup> Nguyen Hoang Bac, M.D., Ph.D.,<sup>6</sup> Bong Ki Cha, M.D., Ph.D.,<sup>7</sup>

8 Takumi Imamura, M.S.,<sup>8</sup> Takuhiro Sonoyama, M.D., Ph.D.,<sup>8</sup> Genki Ichihashi, M.Pharm.,<sup>8</sup> Takao

9 Sanaki, Ph.D.,<sup>9</sup> Yuko Tsuge, M.S.,<sup>8</sup> Takeki Uehara, Ph.D.,<sup>8</sup> and Hiroshi Mukae, M.D., Ph.D.<sup>10</sup>

10

11 **AFFILIATIONS:**

12 <sup>1</sup>The Institute of Medical Science, The University of Tokyo, Tokyo, Japan

13 <sup>2</sup>Disease Control and Prevention Center, National Center for Global Health and Medicine,

14 Tokyo, Japan

15 <sup>3</sup>Division of Infectious Diseases, University of Pittsburgh School of Medicine, Pittsburgh,

16 Pennsylvania, USA

17 <sup>4</sup>Departments of Microbiology and Infectious Diseases, Fujita Health University School of

18 Medicine, Toyoake, Japan

19 <sup>5</sup>Infectious Diseases Center, Rinku General Medical Center, Izumisano, Japan

20 <sup>6</sup>Endoscopic Surgery Training Center, University Medical Center, University of Medicine and

21 Pharmacy, Ho Chi Minh City, Vietnam

22 <sup>7</sup>Department of Internal Medicine, Chung-Ang Medical Health Care System Hyundae Hospital,

23 Gyeonggi-do, Republic of Korea

24 <sup>8</sup>Drug Development and Regulatory Science Division, Shionogi & Co., Ltd., Osaka, Japan

25 <sup>9</sup>Research Division, Shionogi & Co., Ltd., Toyonaka, Japan

26 <sup>10</sup>Department of Respiratory Medicine, Nagasaki University Graduate School of Biomedical

27 Sciences, Nagasaki, Japan

28

29 **CORRESPONDING AUTHOR:**

30 Takeki Uehara

31 Drug Development and Regulatory Science Division, Shionogi & Co., Ltd.

32 Address: 8F, Nissay Yodoyabashi East, 3-3-13 Imabashi, Chuo-ku, Osaka 541-0042, Japan

33 Email: [takeki.uehara@shionogi.co.jp](mailto:takeki.uehara@shionogi.co.jp)

34 Telephone: +81-6-6209-6907

35

36 **Manuscript word count:** 2930 words

37

38 **Key Points**

39 **Question** Can ensitrelvir, an oral severe acute respiratory syndrome coronavirus 2 3C-like  
40 protease inhibitor, shorten the duration of symptoms in patients with mild-to-moderate COVID-  
41 19 irrespective of risk factors for severe disease?

42 **Findings** In this phase 3 part of a phase 2/3, double-blind, randomized study SCORPIO-SR, a  
43 statistically significant difference was observed in the time to resolution of five COVID-19  
44 symptoms between ensitrelvir 125 mg and placebo in patients randomized in less than 72 hours  
45 of disease onset. Viral RNA and viral titer demonstrated significant reduction vs placebo.

46 **Meaning** Ensitrelvir 125 mg treatment shortened time to resolution of key COVID-19  
47 symptoms.

48

49 **Abstract**

50 **IMPORTANCE** Treatment options for coronavirus disease 2019 (COVID-19) that can be used  
51 irrespective of risk factors for severe disease are warranted.

52 **OBJECTIVE** To assess the efficacy and safety of ensitrelvir in patients with mild-to-moderate  
53 COVID-19.

54 **DESIGN** The phase 3 part of a phase 2/3, double-blind, randomized, placebo-controlled study  
55 conducted from February 10 to July 10, 2022.

56 **SETTING** A multicenter study conducted at 92 institutions in Japan, Vietnam, and South Korea.

57 **PARTICIPANTS** Patients (aged 12 to <70 years) with mild-to-moderate COVID-19 within 120  
58 hours of positive viral testing.

59 **INTERVENTIONS** Patients were randomized (1:1:1) to receive once-daily ensitrelvir 125 mg  
60 (375 mg on day 1), 250 mg (750 mg on day 1), or placebo for 5 days. Among 1821 randomized  
61 patients, 1030 (347, 340, and 343 in the ensitrelvir 125-mg, ensitrelvir 250-mg, and placebo  
62 groups, respectively) were randomized in less than 72 hours of disease onset and assessed as the  
63 primary analysis population.

64 **MAIN OUTCOMES AND MEASURES** The primary end point was the time to resolution of  
65 five COVID-19 symptoms (stuffy or runny nose, sore throat, cough, feeling hot or feverish, and  
66 low energy or tiredness). Other end points included virologic efficacy and safety.

67 **RESULTS** The mean age was 35.7, 35.3, and 34.7 years, and 193 (55.6%), 185 (54.4%), and  
68 174 (50.7%) patients were men in the ensitrelvir 125-mg, ensitrelvir 250-mg, and placebo  
69 groups, respectively (intention-to-treat, primary analysis population). A significant difference  
70 ( $P=.04$  with a Peto-Prentice generalized Wilcoxon test stratified by vaccination history) was  
71 observed in the primary end point between ensitrelvir 125 mg and placebo in the primary

72 analysis population (difference in median, –24.3 hours; 95% confidence interval, –78.7 to 11.7).

73 Viral RNA levels on day 4 and time to negative viral titer demonstrated significant reduction vs

74 placebo. The incidence of adverse events was 44.2%, 53.6%, and 24.8% in the ensitrelvir

75 125-mg, ensitrelvir 250-mg, and placebo groups, respectively. No treatment-related serious

76 adverse events were reported.

77 **CONCLUSIONS AND RELEVANCE** Treatment with ensitrelvir 125 mg demonstrated

78 clinical and antiviral efficacy without new safety concerns. Generalizability to non-Asian

79 populations should be confirmed.

80 **TRIAL REGISTRATION** Japan Registry of Clinical Trials identifier: [jRCT2031210350](https://www.clinicaltrials.gov/ct2/show/study?term=jRCT2031210350).

81

## 82 **Introduction**

83 Coronavirus disease 2019 (COVID-19) has rapidly spread worldwide, and in November 2021,  
84 the severe acute respiratory syndrome coronavirus 2 (SARS-CoV-2) omicron variant was  
85 declared a variant of concern by the World Health Organization.<sup>1</sup> Patients infected with the  
86 omicron variant generally experience mild symptoms.<sup>2-4</sup> However, despite the worldwide  
87 administration of vaccinations, the omicron BA.5\* subvariant, which evades vaccine-induced  
88 immunity, has become dominant and has resulted in a rapid increase in new COVID-19 cases.<sup>5</sup>  
89 Moreover, emergence of the omicron XBB\* and BQ.1\* sublineages, which also evade immunity,  
90 has been reported worldwide.<sup>6</sup>

91 Several antiviral drugs against SARS-CoV-2 infection are available worldwide, such as RNA  
92 polymerase inhibitors remdesivir<sup>7</sup> and molnupiravir,<sup>8</sup> and a SARS-CoV-2 3C-like (3CL)  
93 protease inhibitor nirmatrelvir combined with pharmacokinetic booster ritonavir.<sup>9</sup> However, their  
94 clinical trials were conducted in high-risk, unvaccinated patients and at a time when the SARS-  
95 CoV-2 Delta or pre-Delta variants were predominant. Therapeutic monoclonal antibodies against  
96 SARS-CoV-2 have also been used for COVID-19, but recent *in vitro* studies suggest that most of  
97 them are less efficacious to omicron subvariants than to previous variants.<sup>10-12</sup> Novel treatment  
98 options that can be used irrespective of risk factors for severe disease are thus warranted.

99 Ensitrelvir fumaric acid is an oral SARS-CoV-2 3CL protease inhibitor that originated  
100 through collaborative research between Shionogi & Co., Ltd. and Hokkaido University in  
101 Japan.<sup>13</sup> Ensitrelvir treatment showed antiviral effects against multiple SARS-CoV-2 variants of  
102 concern, including omicron subvariants, in *in vitro* and *in vivo* studies.<sup>13-17</sup> A seamless, phase  
103 2/3, double-blind, randomized, placebo-controlled study is currently underway (Japan Registry  
104 of Clinical Trials identifier: jRCT2031210350). In the phase 2a and 2b parts, ensitrelvir

105 treatment demonstrated decreased viral load vs placebo.<sup>18,19</sup> Moreover, improvements in four  
106 respiratory symptoms (stuffy or runny nose, sore throat, shortness of breath, and cough) and the  
107 composite of the four respiratory symptoms and feverishness were shown in the phase 2b part.<sup>19</sup>  
108 The SCORPIO-SR trial is the phase 3 part of the phase 2/3 study and assessed the efficacy and  
109 safety of 5-day, once-daily ensitrelvir in patients with mild-to-moderate COVID-19.

110

## 111 **Methods**

### 112 **Study Design**

113 The SCORPIO-SR trial was conducted from February 10 to July 10, 2022, across 92 institutions  
114 in Japan (65 sites), Vietnam (2 sites), and South Korea (25 sites). The study protocol has been  
115 published previously.<sup>20</sup> Patients with mild-to-moderate COVID-19 were randomized (1:1:1) to  
116 the ensitrelvir 125 mg, ensitrelvir 250 mg, or placebo group. The patients were followed up until  
117 day 28. Considering that the pharmacokinetic/pharmacodynamic analysis of phase 2b part of the  
118 current phase 2/3 study did not show a clear difference in antiviral efficacy between the two  
119 ensitrelvir dose groups, the 125-mg group was chosen as the efficacy analysis population.  
120 Analyses between the ensitrelvir 250-mg and placebo groups were performed as a secondary  
121 comparison.<sup>20</sup>

122 The current phase 2/3 study employed a seamless design to maximize patient recruitment  
123 during the SARS-CoV-2 epidemic, and the current phase 3 part was initiated with continuous  
124 patient enrollment after the phase 2b part. The phase 3 protocol was amended based on data  
125 obtained in the phase 2b part and in view of the changes in clinical features of the epidemic  
126 caused by the omicron variant and its subvariants. All protocol amendments, including the  
127 changes in the primary endpoint, analysis populations, statistical tests, and sample size

128 estimation, were made blinded from the phase 3 data and were finalized based on consultations  
129 with infectious disease experts and regulatory authorities.<sup>20</sup>

130 This study was conducted in accordance with the principles of the Declaration of Helsinki,  
131 Good Clinical Practice guidelines, and other applicable laws and regulations. The study protocol  
132 was reviewed and approved by the institutional review boards of all the participating institutions  
133 (see the List of Investigators in the Supplement). Written informed consent was obtained from all  
134 patients or their legally acceptable representatives.

135

### 136 **Patients**

137 Eligible patients with mild-to-moderate COVID-19 were those aged 12 to <70 years who tested  
138 positive for SARS-CoV-2 within 120 hours prior to randomization. Patients should have had a  
139 time of  $\leq 120$  hours from the onset of COVID-19 symptoms to randomization and at least one  
140 moderate or severe symptom or worsening of an existing moderate or severe symptom among  
141 the 12 COVID-19 symptoms defined based on the United States Food and Drug Administration  
142 (FDA) guidance<sup>21</sup> (eMethods). Key exclusion criteria included an awake oxygen saturation of  
143  $\leq 93\%$  (room air), supplemental oxygen requirement, anticipated COVID-19 exacerbation within  
144 48 hours of randomization, suspected active and systemic infections other than COVID-19  
145 requiring treatment, current or chronic history of moderate or severe liver disease, known hepatic  
146 or biliary abnormalities (except for Gilbert's syndrome or asymptomatic gallstones), and  
147 moderate-to-severe kidney disease (eMethods).

148



149 **Randomization, Blinding, and Treatment**

150 Patient randomization was performed using an interactive response technology system and  
151 stratification by the time from the onset of COVID-19 to randomization (<72 hours vs  
152  $\geq$ 72 hours) and SARS-CoV-2 vaccination history (at least one dose of vaccination: yes vs no).  
153 All patients and study staff were blinded to the treatment, and emergency unblinding per the  
154 investigator's request was allowed in case of occurrence of adverse events to determine the  
155 appropriate therapy for the patient. Patients received ensitrelvir (375 mg on day 1 and 125 mg on  
156 days 2 through 5 or 750 mg on day 1 and 250 mg on days 2 through 5) or matching placebo  
157 tablets, which were identical in appearance and packaging, without dose modification. Treatment  
158 was discontinued in case of COVID-19 exacerbation, serious or intolerable adverse events, and  
159 pregnancy (eMethods).

160

161 **End Points**

162 The primary end point was the time to resolution of five COVID-19 symptoms (stuffy or runny  
163 nose, sore throat, cough, feeling hot or feverish, and low energy or tiredness) on the basis that  
164 they were most commonly observed symptoms in the phase 2b part of the current phase 2/3  
165 study, conducted during the omicron BA.1 epidemic.<sup>20</sup> Key secondary end points were the  
166 change from baseline in SARS-CoV-2 viral RNA level on day 4 (key secondary end point 1) and  
167 time to first negative SARS-CoV-2 viral titer (key secondary end point 2). The time to resolution  
168 of 12 COVID-19 symptoms (above-mentioned five symptoms, shortness of breath, muscle or  
169 body aches, headache, chills or shivering, nausea, vomiting, and diarrhea) and 14 COVID-19  
170 symptoms (above-mentioned 12 symptoms, anosmia, and dysgeusia) and the SARS-CoV-2 viral  
171 RNA and viral titer up to day 21 were assessed as other secondary end points. Resolution of five,

172 12, and 14 COVID-19 symptoms was achieved when all the symptoms disappeared, improved,  
173 or maintained after first administration of study intervention and the symptom resolution was  
174 sustained for at least 24 hours in a patient. Each of the 12 COVID-19 symptoms was rated on a  
175 4-point scale (None=0, Mild=1, Moderate=2, or Severe=3), whereas anosmia and dysgeusia were  
176 rated on a 3-point scale (Same as usual=0, Less than usual=1, or No sense of smell/taste=2) by  
177 the patient (eMethods). The safety end point was the incidence of adverse events that emerged  
178 after treatment initiation.

179

### 180 **Assessments**

181 The severity of each COVID-19 symptom was recorded in a diary twice daily (morning and  
182 evening) until day 9 and once daily (evening) from days 10 to 21. SARS-CoV-2 viral titer and  
183 viral RNA were quantified using nasopharyngeal swabs collected on days 1 (before drug  
184 administration), 2 to 6 (days 3 and 5 as optional visits), 9, 14, and 21 (or study discontinuation).  
185 Adverse events were coded using the Medical Dictionary for Regulatory Activities, version 24.0  
186 (eMethods).

187

### 188 **Statistical Analysis**

189 Considering the main pathophysiology of COVID-19 (viral proliferation for several days  
190 followed by inflammatory reaction by the host immune system starting around 7 days after  
191 onset), antiviral treatment is expected to be most effective when initiated in the early phase of  
192 infection.<sup>20</sup> Based on an epidemiologic analysis in Japan, 62% of patients with COVID-19  
193 hospitalized during the omicron BA.5 epidemic experienced disease progression within 3 days of  
194 the onset.<sup>22</sup> To evaluate the antiviral and clinical efficacy of ensitrelvir in the optimal patient

195 population, the primary analysis population for the primary and key secondary end points was  
196 defined as patients randomized in less than 72 hours of disease onset in the intention-to-treat  
197 population.<sup>20</sup> As reported previously,<sup>20</sup> assuming a Weibull distribution in the time to resolution  
198 of the five COVID-19 symptoms, 230 patients per group were required to compare the survival  
199 distributions of the primary end point between the ensitrelvir 125-mg and placebo groups using  
200 the Peto-Prentice generalized Wilcoxon test with 80% power and a two-sided significance level  
201 of .05. Assuming a 10% dropout rate before enrollment, the final sample size for the primary  
202 analysis population was set to 260 patients per group (780 patients in total).<sup>20</sup> Of note, patient  
203 enrollment was continued as originally planned to include 595 patients randomized within 120  
204 hours of disease onset each in the ensitrelvir 125-mg, 250-mg, and placebo groups.

205 The statistical significance vs placebo for the primary end point in the primary analysis  
206 population was tested using a Peto-Prentice generalized Wilcoxon test stratified by SARS-CoV-2  
207 vaccination history (yes or no). A fixed-sequence hierarchical testing procedure was applied to  
208 control for type I errors. The test was performed in the order of primary end point, key secondary  
209 end point 1, and key secondary end point 2 in the primary analysis population. The tests were  
210 repeated in the same order in patients randomized within 120 hours of disease onset until failure  
211 in statistical significance (two-sided significance level of  $\geq .05$ ).<sup>20</sup> All statistical comparisons  
212 were performed at a two-sided significance level of .05. No imputation was performed for  
213 missing data. All analyses were performed using SAS version 9.4 (SAS Institute, Inc, Cary, NC,  
214 USA; eMethods).

215

## 216 **Results**

### 217 **Patients**

218 A total of 1821 patients were enrolled; 607, 606, and 608 were randomized to the ensitrelvir  
219 125-mg, ensitrelvir 250-mg, and placebo groups, respectively (Figure 1). Of the 1821 patients,  
220 1769 (97.1%) completed the study and 1030 (56.6%) were randomized in less than 72 hours of  
221 disease onset.

222 Patient characteristics were similar across the groups (Table 1 and eTable 1) and were largely  
223 representative of the expected patient population (eTable 2). In all groups, the mean age was  
224 approximately 35 years, approximately half of the patients were men, and almost all patients  
225 were Asian. The majority (>90%) of patients had received  $\geq 2$  doses of the SARS-CoV-2 vaccine.  
226 Prior acetaminophen use was recorded for approximately 26% to 36% of the patients. Most  
227 ( $\geq 85\%$ ) patients were infected with the omicron BA.1 or BA.2 subvariant. The most common  
228 COVID-19 symptoms across treatment groups were stuffy or runny nose, sore throat, cough,  
229 feeling hot or feverish, and low energy or tiredness (Table 1). Approximately 70% of the patients  
230 were those without risk factors for severe disease (Table 1 and eTable 3).

231

### 232 **Primary End Point**

233 A significant difference ( $P=.04$  with a Peto-Prentice generalized Wilcoxon test) was observed  
234 between ensitrelvir 125 mg (median, 167.9 hours; 95% confidence interval [CI], 145.0 to 197.6)  
235 and placebo (median, 192.2 hours; 95% CI, 174.5 to 238.3) in the time to resolution of the five  
236 COVID-19 symptoms among patients randomized in less than 72 hours of disease onset, i.e.,  
237 primary analysis population (difference in median,  $-24.3$  hours; 95% CI,  $-78.7$  to 11.7; Figure  
238 2A). No significant difference in the time to resolution of the five COVID-19 symptoms was

239 observed between ensitrelvir 125 mg and placebo for patients randomized within 120 hours of  
240 disease onset (Figure 2B).

241

### 242 **Key Secondary End Points**

243 The least squares mean change from baseline in SARS-CoV-2 viral RNA level ( $\log_{10}$  copies/mL)  
244 on day 4 in the primary analysis population was  $-2.48$  (standard error [SE], 0.08) with the  
245 ensitrelvir 125-mg group, as compared with  $-1.01$  (SE, 0.08) with the placebo group ( $P < .001$ )  
246 (Table 2). A significant difference ( $P < .001$ ) was observed in the time to first negative SARS-  
247 CoV-2 viral titer in the primary analysis population between ensitrelvir 125 mg (median, 36.2  
248 hours; 95% CI, 23.4 to 43.2) and placebo (median, 65.3 hours; 95% CI, 62.0 to 66.8; eFigure  
249 1A). Similar results were obtained for patients randomized within 120 hours of disease onset  
250 (eFigure 1B).

251

### 252 **Other Secondary End Points**

253 No significant difference was observed in the time to resolution of the 12 COVID-19 symptoms  
254 in the primary analysis population between ensitrelvir 125 mg and placebo. A significant  
255 difference ( $P = .03$ ) was observed in the time to resolution of the 14 COVID-19 symptoms in the  
256 primary analysis population between ensitrelvir 125 mg (median, 187.8 hours; 95% CI, 156.4 to  
257 217.0) and placebo (median, 231.8 hours; 95% CI, 192.1 to 265.8; Table 2).

258 No significant difference from placebo was observed with ensitrelvir 125 mg in the time to  
259 resolution of the 12 and 14 COVID-19 symptoms in patients randomized within 120 hours of  
260 disease onset (eTable 4). SARS-CoV-2 viral RNA levels and SARS-CoV-2 viral titers in the

261 ensitrelvir 125-mg group were significantly lower than those in the placebo group up to day 9  
262 and day 6, respectively, irrespective of time to randomization (eFigure 2A-C and eFigure 3A-C).

263

## 264 **Safety**

265 The incidence of adverse events was 44.2%, 53.6%, and 24.8% in the ensitrelvir 125-mg,  
266 ensitrelvir 250-mg, and placebo groups, respectively; the incidence of treatment-related adverse  
267 events was 24.5%, 36.2%, and 9.9% in the ensitrelvir 125-mg, ensitrelvir 250-mg, and placebo  
268 groups, respectively (Table 3). Most of the adverse events were mild, and a majority of  
269 treatment-related adverse events resolved without sequelae.

270 Serious adverse events were observed in two patients (heavy menstrual bleeding in one  
271 patient in the ensitrelvir 125-mg group on day 14 and acute cholecystitis in one patient in the  
272 placebo group on day 9), both of which were judged as not treatment related. A decrease in high-  
273 density lipoprotein levels was the most frequently reported adverse event (31.1%, 38.6%, and  
274 3.8% in the ensitrelvir 125-mg, ensitrelvir 250-mg, and placebo groups, respectively) and the  
275 most common treatment-related adverse event (18.4%, 26.2%, and 1.5% in the ensitrelvir 125-  
276 mg, ensitrelvir 250-mg, and placebo groups, respectively) in both ensitrelvir groups. Adverse  
277 events leading to treatment discontinuation were recorded in 12 patients. All treatment-related  
278 adverse events leading to treatment discontinuation were deemed to be resolving or resolved  
279 after discontinuation of the study. No adverse events leading to death were reported (Table 3).

280

## 281 **Discussion**

282 This phase 3 trial was conducted during the SARS-CoV-2 omicron BA.2 epidemic to assess the  
283 efficacy and safety of 5-day, once-daily, oral ensitrelvir for mild-to-moderate COVID-19, using

284 the ensitrelvir 125-mg group as the efficacy analysis population.<sup>20</sup> More than 90% of the patients  
285 had received  $\geq 2$  doses of the SARS-CoV-2 vaccine, and approximately 70% of the participants  
286 did not have risk factors for severe disease. Treatment with ensitrelvir 125 mg once daily (375  
287 mg on day 1) vs placebo showed a significant difference in the time to resolution of the five  
288 typical symptoms of the omicron variant infection in patients randomized in less than 72 hours of  
289 disease onset. Moreover, a significant reduction compared with placebo was observed in the two  
290 key secondary end points representing antiviral efficacy. In contrast to the results in patients  
291 randomized in less than 72 hours of disease onset, no significant difference between ensitrelvir  
292 125 mg and placebo was observed in the time to resolution of the five COVID-19 symptoms in  
293 patients randomized within 120 hours, suggesting the importance of early treatment initiation.  
294 Ensitrelvir was generally well tolerated, and the most commonly observed adverse event, a  
295 decrease in high-density lipoprotein level, is consistent with the findings of previous clinical  
296 studies of ensitrelvir.<sup>18,19,23</sup>

297 Previous clinical trials on oral antivirals for COVID-19 were conducted during the SARS-  
298 CoV-2 Delta epidemic.<sup>8,9</sup> These trials involved unvaccinated, high-risk adults with COVID-19  
299 and demonstrated a reduction in the risk of hospitalization or death as the primary end point.<sup>8,9</sup>  
300 However, given the administration of vaccinations against COVID-19 and the nature of the  
301 infection caused by the omicron variant, these end points could no longer be a viable option.  
302 Indeed, published studies report a significant reduction in the risk of death, hospitalization, or  
303 severe disease with the omicron vs the Delta infection.<sup>3,4,24</sup> Moreover, real-world studies suggest  
304 limited effectiveness of these antivirals to high-risk, vaccinated adults or patients infected with  
305 the omicron variant in reducing the risk of severe COVID-19.<sup>25,26</sup> In the current SCORPIO-SR  
306 trial, none of the patients reported mechanical ventilation or death, and only one patient each in

307 the ensitrelvir 250-mg and placebo groups required COVID-19–related hospitalization or  
308 equivalent recuperation during the study period (data not shown).

309 The symptom-based efficacy end points are suggested by the FDA as an alternative goal in  
310 the development of antiviral treatment options for COVID-19 caused by recent SARS-CoV-2  
311 variants.<sup>21</sup> The phase 2/3 EPIC-SR study employed self-reported, sustained alleviation of all  
312 targeted COVID-19 symptoms for four days as a novel primary end point to assess the efficacy  
313 of nirmatrelvir with ritonavir.<sup>27</sup> Although a shortened time to sustained alleviation and resolution  
314 of COVID-19 signs/symptoms was demonstrated in non-hospitalized adults with COVID-19 at  
315 high risk of severe disease (EPIC-HR study),<sup>28</sup> the EPIC-SR study did not show a meaningful  
316 difference in the time to sustained symptom alleviation through day 28.<sup>29</sup> The current SCORPIO-  
317 SR study met the primary end point and demonstrated clinical efficacy of ensitrelvir in the  
318 resolution of COVID-19 symptoms (sustained for at least 24 hours) irrespective of risk factors  
319 for severe disease. Sustained resolution or alleviation of self-assessed symptoms can be  
320 considered a valid and clinically meaningful efficacy end point for COVID-19 treatment.

321 The major limitation of this study is that it was conducted only in Asian countries, with a  
322 limited number of non-Asian patients. The efficacy and safety of ensitrelvir in various patient  
323 populations should be further assessed in daily clinical settings.

324 In conclusion, ensitrelvir treatment vs placebo demonstrated a reduction in the time to  
325 resolution of the five typical COVID-19 symptoms in patients treated in less than 72 hours of  
326 disease onset. The results also showed favorable antiviral efficacy of ensitrelvir. No new safety  
327 concerns were identified, and ensitrelvir was well tolerated.

328



329 **ACKNOWLEDGMENTS**

330 **Author Contributions:** Dr Uehara had full access to all the data in the study and takes  
331 responsibility for the integrity of the data and the accuracy of the data analysis.

332 Concept and design: Hiroshi Yotsuyanagi, Norio Ohmagari, Yohei Doi, Takumi Imamura,  
333 Takuhiro Sonoyama, Genki Ichihashi, Takao Sanaki, Yuko Tsuge, Takeki Uehara, and Hiroshi  
334 Mukae.

335 Acquisition, analysis, or interpretation of data: Hiroshi Yotsuyanagi, Norio Ohmagari, Yohei  
336 Doi, Masaya Yamato, Nguyen Hoang Bac, Bong Ki Cha, Takumi Imamura, Takuhiro  
337 Sonoyama, Genki Ichihashi, Takao Sanaki, Yuko Tsuge, Takeki Uehara, and Hiroshi Mukae.

338 Drafting of the manuscript: Takumi Imamura, Takuhiro Sonoyama, Genki Ichihashi, Takao  
339 Sanaki, Yuko Tsuge, Takeki Uehara.

340 Critical revision of the manuscript for important intellectual content: Hiroshi Yotsuyanagi, Norio  
341 Ohmagari, Yohei Doi, Masaya Yamato, Nguyen Hoang Bac, Bong Ki Cha, Takumi Imamura,  
342 Takuhiro Sonoyama, Genki Ichihashi, Takao Sanaki, Yuko Tsuge, Takeki Uehara, and Hiroshi  
343 Mukae.

344 Statistical analysis: Takumi Imamura.

345 Administrative, technical, or material support: Genki Ichihashi, Takao Sanaki, Yuko Tsuge.

346 Supervision: Takeki Uehara, and Hiroshi Mukae.

347 **Conflict of Interest Disclosures:** Dr Yotsuyanagi has received consulting fees from Shionogi,  
348 lecture fees from Shionogi and ViiV Healthcare, and travel support from Shionogi outside the  
349 submitted work. He serves as an advisory board member for Shionogi and President of the  
350 Japanese Society of Infectious Diseases. Drs Ohmagari, Yamato, and Nguyen declare no conflict  
351 of interest. Dr Doi has received funding relevant to the submitted work from Shionogi and grants

352 from Entasis; consulting fees from Gilead Sciences, Moderna, Shionogi, GSK, Meiji Seika,  
353 bioMerieux, and FujiFilm; and lecture fees from Gilead Sciences, Shionogi, MSD, and  
354 bioMerieux outside the submitted work. Dr Bong has received funding relevant to the submitted  
355 work from Ildong Pharmaceutical (partner of Shionogi for the development of ensitrelvir in the  
356 Republic of Korea) and grants from Hyundai Bioscience, Daewoong Pharmaceutical, and Asan  
357 Pharm outside the submitted work. Mr Imamura, Dr Sonoyama, Mr Ichihashi, Mr Sanaki, Ms  
358 Tsuge, and Dr Uehara are full-time employees of Shionogi and may own stocks or stock options.  
359 Dr Mukae has received funding relevant to the submitted work from Shionogi, consulting fees  
360 from Shionogi and MSD, and lecture fees from Shionogi, MSD, Gilead Sciences, AstraZeneca,  
361 Pfizer, and GSK outside the submitted work.

362 **Funding/Support:** Planning, conduct, and analysis of the study were funded by Shionogi & Co.,  
363 Ltd. and the Organization of the Ministry of Health, Labour and Welfare, Japan.

364 **Role of the Funder/Sponsor:** Employees of Shionogi & Co., Ltd. participated in study design;  
365 collection, analysis, and interpretation of data; writing of the report; and decision to submit for  
366 publication.

367 **Meeting presentations:** The work reported herein was presented in part at the joint congress of  
368 the 92nd Annual Meeting of the Japanese Association for Infectious Diseases, Western Japan  
369 Branch/the 65th Annual Meeting of the Japanese Association for Infectious Diseases, Central  
370 Japan Branch/the 70th Annual Meeting of the Japanese Society of Chemotherapy, Western Japan  
371 Branch (November 2022).

372 **Additional Contributions:** The authors and research team thank all the patients involved in this  
373 study and Masahiro Kinoshita, Manami Yoshida, and Satoshi Kojima (Shionogi & Co., Ltd.) for  
374 preparing technical support documents and an earlier version of the manuscript draft. Support for

375 data management was provided by EPS Corporation and funded by Shionogi & Co., Ltd.

376 Medical writing support was provided by Mami Hirano, M.Sc., of Cactus Life Sciences (part of

377 Cactus Communications), and funded by Shionogi & Co., Ltd.

378

379 **REFERENCES**

- 380 1. World Health Organization. Classification of Omicron (B.1.1.529): SARS-CoV-2 variant  
381 of concern. [https://www.who.int/news/item/26-11-2021-classification-of-omicron-\(b.1.1.529\)-](https://www.who.int/news/item/26-11-2021-classification-of-omicron-(b.1.1.529)-sars-cov-2-variant-of-concern)  
382 [sars-cov-2-variant-of-concern](https://www.who.int/news/item/26-11-2021-classification-of-omicron-(b.1.1.529)-sars-cov-2-variant-of-concern). Accessed June 29, 2023.
- 383 2. Wolter N, Jassat W, Walaza S, et al. Early assessment of the clinical severity of the  
384 SARS-CoV-2 omicron variant in South Africa: a data linkage study. *Lancet*.  
385 2022;399(10323):437-446.
- 386 3. Auvigne V, Vaux S, Strat YL, et al. Severe hospital events following symptomatic  
387 infection with Sars-CoV-2 Omicron and Delta variants in France, December 2021-January 2022:  
388 a retrospective, population-based, matched cohort study. *EClinicalMedicine*. 2022;48:101455.
- 389 4. Nyberg T, Ferguson NM, Nash SG, et al. Comparative analysis of the risks of  
390 hospitalisation and death associated with SARS-CoV-2 omicron (B.1.1.529) and delta  
391 (B.1.617.2) variants in England: a cohort study. *Lancet*. 2022;399(10332):1303-1312.
- 392 5. Kopsidas I, Karagiannidou S, Kostaki EG, et al. Global distribution, dispersal patterns,  
393 and trend of several Omicron subvariants of SARS-CoV-2 across the globe. *Trop Med Infect Dis*.  
394 2022;7(11):373.
- 395 6. World Health Organization. TAG-VE statement on Omicron sublineages BQ.1 and XBB.  
396 [https://www.who.int/news/item/27-10-2022-tag-ve-statement-on-omicron-sublineages-bq.1-and-](https://www.who.int/news/item/27-10-2022-tag-ve-statement-on-omicron-sublineages-bq.1-and-xbb)  
397 [xbb](https://www.who.int/news/item/27-10-2022-tag-ve-statement-on-omicron-sublineages-bq.1-and-xbb). Accessed June 29, 2023.
- 398 7. Beigel JH, Tomashek KM, Dodd LE, et al. Remdesivir for the treatment of Covid-19 -  
399 final report. *N Engl J Med*. 2020;383(19):1813-1826.
- 400 8. Jayk Bernal A, Gomes da Silva MM, Musungaie DB, et al. Molnupiravir for oral  
401 treatment of Covid-19 in nonhospitalized patients. *N Engl J Med*. 2022;386(6):509-520.

- 402 9. Hammond J, Leister-Tebbe H, Gardner A, et al. Oral nirmatrelvir for high-risk,  
403 nonhospitalized adults with Covid-19. *N Engl J Med*. 2022;386(15):1397-408.
- 404 10. Takashita E, Yamayoshi S, Simon V, et al. Efficacy of antibodies and antiviral drugs  
405 against Omicron BA.2.12.1, BA.4, and BA.5 subvariants. *N Engl J Med*. 2022;387(5):468-470.
- 406 11. Yamasoba D, Kosugi Y, Kimura I, et al. Neutralisation sensitivity of SARS-CoV-2  
407 omicron subvariants to therapeutic monoclonal antibodies. *Lancet Infect Dis*. 2022;22(7):942-  
408 943.
- 409 12. Meng B, Abdullahi A, Ferreira IATM, et al. Altered TMPRSS2 usage by SARS-CoV-2  
410 Omicron impacts infectivity and fusogenicity. *Nature*. 2022;603(7902):706-714.
- 411 13. Unoh Y, Uehara S, Nakahara K, et al. Discovery of S-217622, a noncovalent oral SARS-  
412 CoV-2 3CL protease inhibitor clinical candidate for treating COVID-19. *J Med Chem*.  
413 2022;65(9):6499-6512.
- 414 14. Uraki R, Kiso M, Iida S, et al. Characterization and antiviral susceptibility of SARS-  
415 CoV-2 Omicron BA.2. *Nature*. 2022;607(7917):119-127.
- 416 15. Sasaki M, Tabata K, Kishimoto M, et al. S-217622, a SARS-CoV-2 main protease  
417 inhibitor, decreases viral load and ameliorates COVID-19 severity in hamsters. *Sci Transl Med*.  
418 2023;15(679):eabq4064.
- 419 16. Kawashima S, Matsui Y, Adachi T, et al. Ensitrelvir is effective against SARS-CoV-2  
420 3CL protease mutants circulating globally. *Biochem Biophys Res Commun*. 2023;645:132-136.
- 421 17. Uraki R, Ito M, Kiso M, et al. Antiviral and bivalent vaccine efficacy against an omicron  
422 XBB.1.5 isolate. *Lancet Infect Dis*. 2023;23(4):402-403. doi: 10.1016/S1473-3099(23)00070-1.
- 423 18. Mukae H, Yotsuyanagi H, Ohmagari N, et al. A randomized phase 2/3 study of  
424 ensitrelvir, a novel oral SARS-CoV-2 3C-like protease inhibitor, in Japanese patients with mild-

- 425 to-moderate COVID-19 or asymptomatic SARS-CoV-2 infection: results of the phase 2a part.  
426 *Antimicrob Agents Chemother.* 2022;66(10):e0069722.
- 427 19. Mukae H, Yotsuyanagi H, Ohmagari N, et al. Efficacy and safety of ensitrelvir in patients  
428 with mild-to-moderate COVID-19: the phase 2b part of a randomized, placebo-controlled, phase  
429 2/3 study. *Clin Infect Dis.* 2022;76(8):1403-1411. doi: 10.1093/cid/ciac933.
- 430 20. Yotsuyanagi H, Ohmagari N, Doi Y, et al. A phase 2/3 study of S-217622 in participants  
431 with SARS-CoV-2 infection (phase 3 part). *Medicine (Baltimore).* 2023;102(8):e33024.
- 432 21. U.S. Food and Drug Administration. Assessing COVID-19-related symptoms in  
433 outpatient adult and adolescent subjects in clinical trials of drugs and biological products for  
434 COVID-19 prevention or treatment. [https://www.fda.gov/regulatory-information/search-fda-](https://www.fda.gov/regulatory-information/search-fda-guidance-documents/assessing-covid-19-related-symptoms-outpatient-adult-and-adolescent-subjects-clinical-trials-drugs)  
435 [guidance-documents/assessing-covid-19-related-symptoms-outpatient-adult-and-adolescent-](https://www.fda.gov/regulatory-information/search-fda-guidance-documents/assessing-covid-19-related-symptoms-outpatient-adult-and-adolescent-subjects-clinical-trials-drugs)  
436 [subjects-clinical-trials-drugs](https://www.fda.gov/regulatory-information/search-fda-guidance-documents/assessing-covid-19-related-symptoms-outpatient-adult-and-adolescent-subjects-clinical-trials-drugs). Accessed June 29, 2023.
- 437 22. Hiroshima Prefectural Health and Welfare Bureau. Findings from the analysis of J-  
438 SPEED (Surveillance in Post Extreme Emergencies and Disasters, Japan version) data: wave 7  
439 analysis. <https://www.mhlw.go.jp/content/10900000/000975398.pdf>. Japanese. Accessed June  
440 29, 2023.
- 441 23. Shimizu R, Sonoyama T, Fukuhara T, Kuwata A, Matsuo Y, Kubota R. Safety,  
442 tolerability, and pharmacokinetics of the novel antiviral agent ensitrelvir fumaric acid, a SARS-  
443 CoV-2 3CL protease inhibitor, in healthy adults. *Antimicrob Agents Chemother.*  
444 2022;66(10):e0063222.
- 445 24. Hyams C, Challen R, Marlow R, et al. Severity of Omicron (B.1.1.529) and Delta  
446 (B.1.617.2) SARS-CoV-2 infection among hospitalised adults: a prospective cohort study in  
447 Bristol, United Kingdom. *Lancet Reg Health Eur.* 2023;25:100556.

- 448 25. Butler CC, Hobbs FDR, Gbinigie OA, et al. Molnupiravir plus usual care versus usual  
449 care alone as early treatment for adults with COVID-19 at increased risk of adverse outcomes  
450 (PANORAMIC): an open-label, platform-adaptive randomised controlled trial. *Lancet*.  
451 2023;401(10373):281-293.
- 452 26. Najjar-Debbiny R, Gronich N, Weber G, et al. Effectiveness of molnupiravir in high-risk  
453 patients: a propensity score matched analysis. *Clin Infect Dis*. 2023;76(3):453-460.
- 454 27. ClinicalTrials.gov. Evaluation of protease inhibition for COVID-19 in standard-risk  
455 patients (EPIC-SR). ClinicalTrials.gov identifier: NCT05011513.  
456 <https://clinicaltrials.gov/ct2/show/NCT05011513>. Accessed June 29, 2023.
- 457 28. Hammond J, Leister-Tebbe H, Gardner A, et al. 1156. Sustained alleviation and  
458 resolution of targeted COVID-19 symptoms with nirmatrelvir/ritonavir versus placebo. *Open*  
459 *Forum Infect Dis*. 2022;9(Suppl 2):ofac492.994. doi: 10.1093/ofid/ofac492.994.
- 460 29. U.S. Food and Drug Administration. Meeting of the Antimicrobial Drugs Advisory  
461 Committee March 16, 2023: FDA Briefing Document.  
462 <https://www.fda.gov/media/166197/download>. Accessed June 29, 2023.  
463

464 **FIGURES**465 **Figure 1. Patient Disposition**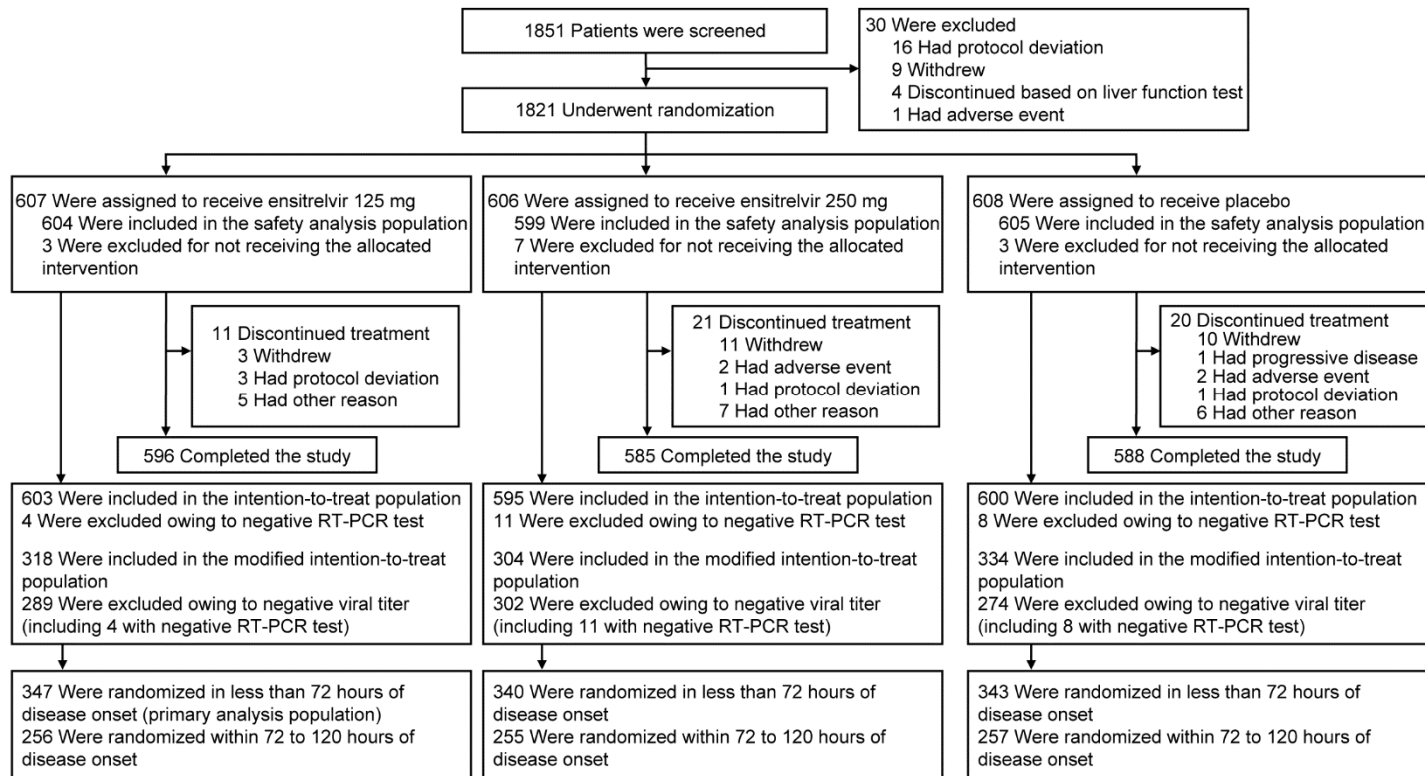

466

467 The intention-to-treat population comprised all patients who tested positive for SARS-CoV-2 viral RNA at baseline, as confirmed by  
 468 an RT-PCR test based on the nasopharyngeal swab sample. The modified intention-to-treat population comprised all patients who  
 469 tested positive for SARS-CoV-2 viral RNA and who had detectable SARS-CoV-2 viral titer at baseline.

470 RT-PCR, reverse transcription-polymerase chain reaction; SARS-CoV-2, severe acute respiratory syndrome coronavirus 2.



471 **Figure 2. Time to Resolution of Five COVID-19 Symptoms (Intention-to-Treat Population)**

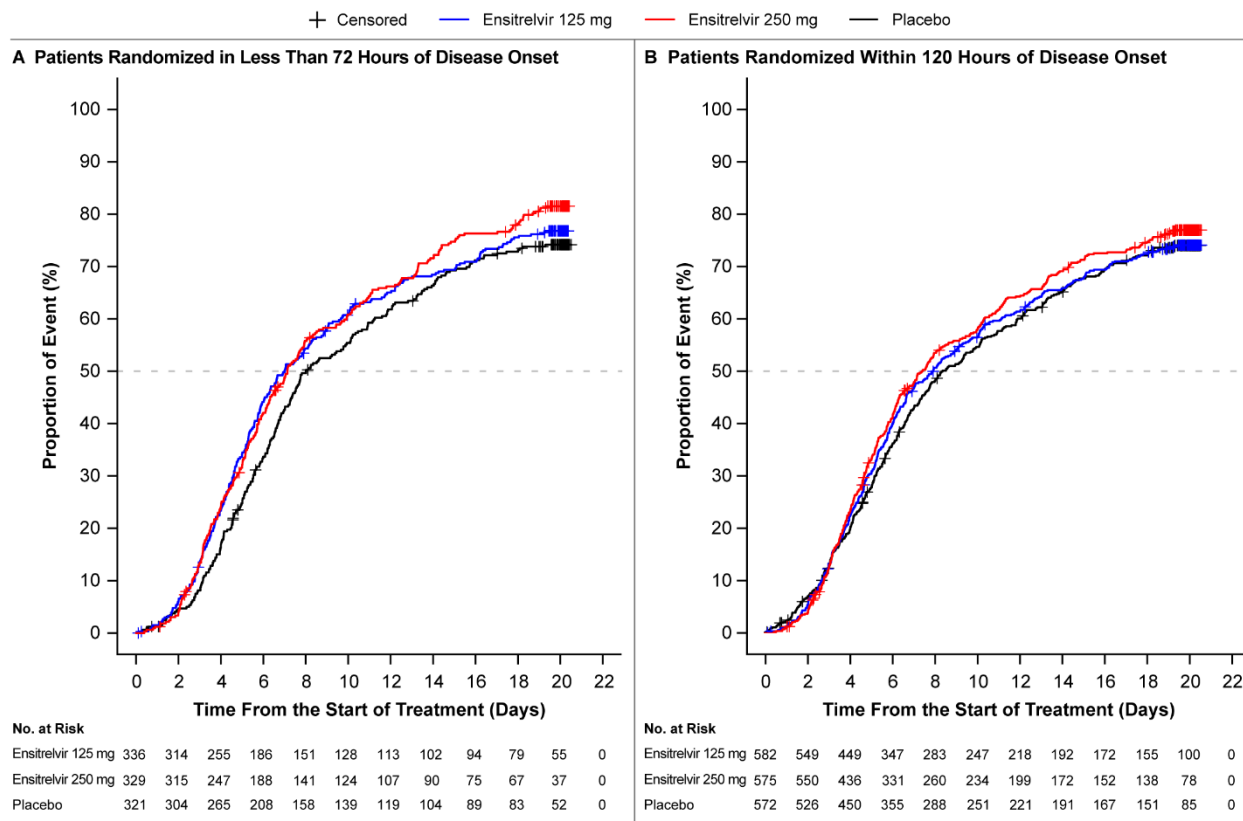

472

473 The analysis was performed for all patients who tested positive for SARS-CoV-2 viral RNA at

474 baseline. Patients randomized in less than 72 hours of disease onset in the ensitrelvir 125-mg

475 group were defined as the primary analysis population. A Peto-Prentice generalized Wilcoxon

476 test was applied to test the statistical significance vs placebo. The test was stratified by SARS-

477 CoV-2 vaccination history (yes or no) for patients randomized in less than 72 hours (panel A)

478 and time from onset to randomization (<72 hours or ≥72 hours) and SARS-CoV-2 vaccination

479 history (yes or no) for patients randomized within 120 hours (panel B). The five COVID-19

480 symptoms were stuffy or runny nose, sore throat, cough, feeling hot or feverish, and low energy

481 or tiredness. Among patients randomized within 120 hours of disease onset (panel B), the median

482 difference in the time to resolution of the five COVID-19 symptoms between ensitrelvir 125 mg

483 and placebo was -10.6 hours (95% confidence interval, -56.9 to 21.3).

484 COVID-19, coronavirus disease 2019; RNA, ribonucleic acid; SARS-CoV-2, severe acute  
485 respiratory syndrome coronavirus 2.  
486

487 TABLES

488 Table 1. Demographic and Clinical Characteristics of the Patients at Baseline (Intention-to-Treat Population)<sup>a</sup>

| Characteristic                                                                  | Patients Randomized in Less Than 72 Hours of Disease Onset |                            |                 | Patients Randomized Within 120 Hours of Disease Onset |                            |                 |
|---------------------------------------------------------------------------------|------------------------------------------------------------|----------------------------|-----------------|-------------------------------------------------------|----------------------------|-----------------|
|                                                                                 | Ensitrelvir 125 mg (N=347) <sup>b</sup>                    | Ensitrelvir 250 mg (N=340) | Placebo (N=343) | Ensitrelvir 125 mg (N=603)                            | Ensitrelvir 250 mg (N=595) | Placebo (N=600) |
| Male sex — no. (%)                                                              | 193 (55.6)                                                 | 185 (54.4)                 | 174 (50.7)      | 318 (52.7)                                            | 323 (54.3)                 | 311 (51.8)      |
| Mean (SD) age — years                                                           | 35.7 (12.5)                                                | 35.3 (12.2)                | 34.7 (12.2)     | 35.9 (12.7)                                           | 35.9 (12.7)                | 35.3 (12.6)     |
| Asian race — no. (%)                                                            | 345 (99.4)                                                 | 338 (99.4)                 | 341 (99.4)      | 601 (99.7)                                            | 593 (99.7)                 | 598 (99.7)      |
| COVID-19 vaccination history — no. (%)                                          |                                                            |                            |                 |                                                       |                            |                 |
| ≥1 vaccination                                                                  | 322 (92.8)                                                 | 313 (92.1)                 | 315 (91.8)      | 562 (93.2)                                            | 551 (92.6)                 | 553 (92.2)      |
| ≥2 vaccinations                                                                 | 316 (91.1)                                                 | 311 (91.5)                 | 310 (90.4)      | 554 (91.9)                                            | 547 (91.9)                 | 545 (90.8)      |
| ≥3 vaccinations                                                                 | 183 (52.7)                                                 | 185 (54.4)                 | 177 (51.6)      | 284 (47.1)                                            | 295 (49.6)                 | 283 (47.2)      |
| Mean (SD) SARS-CoV-2 viral RNA level — log <sub>10</sub> copies/mL <sup>c</sup> | 6.98 (1.01)                                                | 6.89 (1.01)                | 6.93 (0.99)     | 6.83 (1.05)                                           | 6.73 (1.08)                | 6.77 (1.07)     |
| Patients with any risk factors for severe disease — no. (%) <sup>d</sup>        | 107 (30.8)                                                 | 90 (26.5)                  | 89 (25.9)       | 174 (28.9)                                            | 167 (28.1)                 | 152 (25.3)      |
| Prior acetaminophen use — no. (%)                                               | 108 (31.1)                                                 | 90 (26.5)                  | 99 (28.9)       | 216 (35.8)                                            | 191 (32.1)                 | 207 (34.5)      |
| Mean (SD) oxygen saturation — % <sup>e</sup>                                    | 97.3 (1.1)                                                 | 97.2 (2.0)                 | 97.3 (1.2)      | 97.4 (1.1)                                            | 97.3 (1.6)                 | 97.3 (1.1)      |
| SARS-CoV-2 variant — no. (%)                                                    |                                                            |                            |                 |                                                       |                            |                 |
| BA.1/21K (omicron)                                                              | 61 (17.6)                                                  | 57 (16.8)                  | 54 (15.7)       | 131 (21.7)                                            | 130 (21.8)                 | 115 (19.2)      |
| BA.2/21L (omicron)                                                              | 242 (69.7)                                                 | 232 (68.2)                 | 241 (70.3)      | 401 (66.5)                                            | 376 (63.2)                 | 407 (67.8)      |
| BA.1.1.529/21M (omicron)                                                        | 2 (0.6)                                                    | 0 (0.0)                    | 2 (0.6)         | 2 (0.3)                                               | 1 (0.2)                    | 2 (0.3)         |
| BA.4/22A (omicron)                                                              | 1 (0.3)                                                    | 1 (0.3)                    | 0 (0.0)         | 1 (0.2)                                               | 1 (0.2)                    | 0 (0.0)         |
| BA.5/22B (omicron)                                                              | 4 (1.2)                                                    | 5 (1.5)                    | 5 (1.5)         | 5 (0.8)                                               | 7 (1.2)                    | 8 (1.3)         |
| BA.2.12.1/22C (omicron)                                                         | 1 (0.3)                                                    | 2 (0.6)                    | 0 (0.0)         | 1 (0.2)                                               | 5 (0.8)                    | 2 (0.3)         |
| Recombinant                                                                     | 30 (8.6)                                                   | 38 (11.2)                  | 33 (9.6)        | 52 (8.6)                                              | 64 (10.8)                  | 50 (8.3)        |
| Not tested                                                                      | 2 (0.6)                                                    | 1 (0.3)                    | 2 (0.6)         | 2 (0.3)                                               | 2 (0.3)                    | 3 (0.5)         |
| No result                                                                       | 4 (1.2)                                                    | 4 (1.2)                    | 6 (1.7)         | 8 (1.3)                                               | 9 (1.5)                    | 13 (2.2)        |
| Patients with COVID-19 symptoms — no. (%) <sup>f</sup>                          |                                                            |                            |                 |                                                       |                            |                 |
| Respiratory symptoms                                                            |                                                            |                            |                 |                                                       |                            |                 |

| Characteristic          | Patients Randomized in Less Than 72 Hours of Disease Onset |                            |                 | Patients Randomized Within 120 Hours of Disease Onset |                            |                 |
|-------------------------|------------------------------------------------------------|----------------------------|-----------------|-------------------------------------------------------|----------------------------|-----------------|
|                         | Ensitreivir 125 mg (N=347) <sup>b</sup>                    | Ensitreivir 250 mg (N=340) | Placebo (N=343) | Ensitreivir 125 mg (N=603)                            | Ensitreivir 250 mg (N=595) | Placebo (N=600) |
| Stuffy or runny nose    | 283 (83.5)                                                 | 248 (74.3)                 | 247 (75.8)      | 506 (86.1)                                            | 468 (80.6)                 | 464 (80.0)      |
| Sore throat             | 300 (88.5)                                                 | 292 (87.4)                 | 286 (87.7)      | 520 (88.4)                                            | 522 (89.7)                 | 512 (88.3)      |
| Shortness of breath     | 95 (28.0)                                                  | 90 (26.9)                  | 66 (20.2)       | 170 (28.9)                                            | 158 (27.1)                 | 142 (24.5)      |
| Cough                   | 291 (85.8)                                                 | 280 (83.8)                 | 287 (88.0)      | 518 (88.1)                                            | 512 (88.0)                 | 518 (89.3)      |
| Systemic symptoms       |                                                            |                            |                 |                                                       |                            |                 |
| Low energy or tiredness | 265 (78.2)                                                 | 248 (74.3)                 | 229 (70.2)      | 446 (75.9)                                            | 407 (69.9)                 | 408 (70.3)      |
| Muscle or body aches    | 207 (61.1)                                                 | 209 (62.6)                 | 189 (58.0)      | 341 (58.0)                                            | 333 (57.2)                 | 315 (54.3)      |
| Headache                | 219 (64.6)                                                 | 221 (66.2)                 | 213 (65.3)      | 376 (63.9)                                            | 368 (63.2)                 | 367 (63.3)      |
| Chills or shivering     | 223 (65.8)                                                 | 172 (51.5)                 | 167 (51.2)      | 325 (55.3)                                            | 276 (47.4)                 | 289 (49.8)      |
| Feeling hot or feverish | 247 (72.9)                                                 | 234 (70.1)                 | 235 (72.1)      | 378 (64.3)                                            | 379 (65.1)                 | 385 (66.4)      |
| Digestive symptoms      |                                                            |                            |                 |                                                       |                            |                 |
| Nausea                  | 49 (14.5)                                                  | 38 (11.4)                  | 37 (11.3)       | 81 (13.8)                                             | 75 (12.9)                  | 76 (13.1)       |
| Vomiting                | 18 (5.3)                                                   | 14 (4.2)                   | 12 (3.7)        | 33 (5.6)                                              | 24 (4.1)                   | 24 (4.1)        |
| Diarrhea                | 57 (16.8)                                                  | 49 (14.7)                  | 51 (15.6)       | 116 (19.7)                                            | 104 (17.9)                 | 104 (17.9)      |
| Sensation disturbance   |                                                            |                            |                 |                                                       |                            |                 |
| Anosmia                 | 47 (13.9)                                                  | 54 (16.2)                  | 38 (11.7)       | 102 (17.3)                                            | 102 (17.5)                 | 93 (16.0)       |
| Dysgeusia               | 52 (15.3)                                                  | 50 (15.0)                  | 49 (15.0)       | 105 (17.9)                                            | 91 (15.6)                  | 99 (17.1)       |

489 <sup>a</sup> Data for all patients who tested positive for SARS-CoV-2 viral RNA at baseline are shown.

490 <sup>b</sup> Primary analysis population.

491 <sup>c</sup> N=345 for the ensitreivir 125-mg group, N=336 for the ensitreivir 250-mg group, and N=341 for the placebo group in patients randomized in  
492 less than 72 hours of disease onset. N=600 for the ensitreivir 125-mg group, N=589 for the ensitreivir 250-mg group, and N=597 for the placebo  
493 group in patients randomized within 120 hours of disease onset.

494 <sup>d</sup> Age  $\geq 65$  years, BMI  $\geq 30$  kg/m<sup>2</sup>, cancer, cerebrovascular disease, chronic kidney disease, chronic lung disease, chronic liver disease, cystic  
495 fibrosis, diabetes mellitus, disabilities, heart conditions, hypertension, dyslipidemia, human immunodeficiency virus, mental health disorders,  
496 neurologic conditions, primary immunodeficiencies, smoking, solid organ or hematopoietic cell transplantation, tuberculosis, and use of  
497 corticosteroids or other immunosuppressive medications were considered the risk factors for severe disease.

498 <sup>e</sup> N=335 for the ensitrelvir 125-mg group, N=327 for the ensitrelvir 250-mg group, and N=322 for the placebo group in patients randomized in  
499 less than 72 hours of disease onset. N=584 for the ensitrelvir 125-mg group, N=573 for the ensitrelvir 250-mg group, and N=574 for the placebo  
500 group in patients randomized within 120 hours of disease onset.

501 <sup>f</sup> N=339 for the ensitrelvir 125-mg group, N=334 for the ensitrelvir 250-mg group, and N=326 for the placebo group in patients randomized in  
502 less than 72 hours of disease onset. N=588 for the ensitrelvir 125-mg group, N=582 (581 for stuffy or runny nose) for the ensitrelvir 250-mg  
503 group, and N=580 for the placebo group in patients randomized within 120 hours of disease onset.

504 BMI, body mass index; COVID-19, coronavirus disease 2019; SARS-CoV-2, severe acute respiratory syndrome coronavirus 2; SD, standard  
505 deviation.

506

507 **Table 2. Change from Baseline to Day 4 in SARS-CoV-2 Viral RNA Levels, Time to Resolution of the 12 COVID-19 Symptoms, and**  
 508 **Time to Resolution of the 14 COVID-19 Symptoms (Intention-to-Treat Population, Patients Randomized in Less Than 72 Hours of**  
 509 **Disease Onset)**

| Variable                                                                  | Ensitrelvir 125 mg<br>(N=347) <sup>a</sup> | Ensitrelvir 250 mg<br>(N=340) | Placebo<br>(N=343)     |
|---------------------------------------------------------------------------|--------------------------------------------|-------------------------------|------------------------|
| Change from baseline to day 4 in SARS-CoV-2 viral RNA levels <sup>b</sup> |                                            |                               |                        |
| n                                                                         | 340                                        | 333                           | 337                    |
| LS mean (SE) — log <sub>10</sub> copies/mL                                | -2.48 (0.08)                               | -2.49 (0.08)                  | -1.01 (0.08)           |
| Difference from placebo, LS mean (SE)                                     | -1.47 (0.08)                               | -1.48 (0.08)                  |                        |
| 95% CI                                                                    | -1.63 to -1.31                             | -1.64 to -1.32                |                        |
| P value                                                                   | <.001                                      | <.001                         |                        |
| Time to resolution of the 12 COVID-19 symptoms <sup>c</sup>               |                                            |                               |                        |
| n                                                                         | 336                                        | 330                           | 321                    |
| Median (95% CI) — hours                                                   | 179.2 (152.1 to 212.1)                     | 184.9 (168.9 to 226.2)        | 213.2 (185.8 to 253.8) |
| Difference from placebo, median (95% CI)                                  | -34.0 (-85.9 to 8.3)                       | -28.3 (-72.8 to 14.7)         |                        |
| P value <sup>d</sup>                                                      | .07                                        | .08                           |                        |
| Time to resolution of the 14 COVID-19 symptoms <sup>c</sup>               |                                            |                               |                        |
| N                                                                         | 336                                        | 330                           | 321                    |
| Median (95% CI) — hours                                                   | 187.8 (156.4 to 217.0)                     | 190.3 (171.4 to 244.0)        | 231.8 (192.1 to 265.8) |
| Difference from placebo, median (95% CI)                                  | -44.1 (-95.3 to 4.5)                       | -41.5 (-81.2 to 27.3)         |                        |
| P value <sup>d</sup>                                                      | .03                                        | .05                           |                        |

510 <sup>a</sup> Primary analysis population.

511 <sup>b</sup> Analysis by ANCOVA using baseline SARS-CoV-2 viral RNA and SARS-CoV-2 vaccination history (yes or no) as covariates.

512 <sup>c</sup> Low energy or tiredness, muscle or body aches, headache, chills or shivering, feeling hot or feverish, stuffy or runny nose, sore throat, cough,  
 513 shortness of breath (difficulty breathing), nausea, vomiting, and diarrhea.

514 <sup>d</sup> Based on a Peto-Prentice generalized Wilcoxon test stratified by SARS-CoV-2 vaccination history (yes or no).

515 <sup>e</sup> Low energy or tiredness, muscle or body aches, headache, chills or shivering, feeling hot or feverish, stuffy or runny nose, sore throat, cough,  
516 shortness of breath (difficulty breathing), nausea, vomiting, diarrhea, anosmia, and dysgeusia.

517 ANCOVA, analysis of covariance; CI, confidence interval; COVID-19, coronavirus disease 2019; LS, least squares; SARS-CoV-2, severe acute  
518 respiratory syndrome coronavirus 2; SE, standard error.

519

520 **Table 3. Summary of Adverse Events (Safety Analysis Population)<sup>a</sup>**

| <b>Adverse event category</b>                                                                  | <b>Ensitrelvir<br/>125 mg<br/>(N=604)</b> | <b>Ensitrelvir<br/>250 mg<br/>(N=599)</b> | <b>Placebo<br/>(N=605)</b> |
|------------------------------------------------------------------------------------------------|-------------------------------------------|-------------------------------------------|----------------------------|
| Patients with any adverse event — no. (%)                                                      | 267 (44.2)                                | 321 (53.6)                                | 150 (24.8)                 |
| Patients with any treatment-related adverse event — no. (%)                                    | 148 (24.5)                                | 217 (36.2)                                | 60 (9.9)                   |
| Patients with any serious adverse event — no. (%) <sup>b</sup>                                 | 1 (0.2)                                   | 0                                         | 1 (0.2)                    |
| Patients with adverse events leading to death — no. (%)                                        | 0                                         | 0                                         | 0                          |
| Patients with adverse events leading to treatment discontinuation — no. (%) <sup>c</sup>       | 4 (0.7)                                   | 6 (1.0)                                   | 2 (0.3)                    |
| Adverse events occurring in $\geq 2\%$ of patients in either group — no. (%)                   |                                           |                                           |                            |
| Headache                                                                                       | 13 (2.2)                                  | 20 (3.3)                                  | 14 (2.3)                   |
| Diarrhea                                                                                       | 6 (1.0)                                   | 9 (1.5)                                   | 12 (2.0)                   |
| High-density lipoprotein decreased                                                             | 188 (31.1)                                | 231 (38.6)                                | 23 (3.8)                   |
| Blood triglycerides increased                                                                  | 49 (8.1)                                  | 74 (12.4)                                 | 32 (5.3)                   |
| Blood bilirubin increased                                                                      | 36 (6.0)                                  | 56 (9.3)                                  | 6 (1.0)                    |
| Blood cholesterol decreased                                                                    | 20 (3.3)                                  | 28 (4.7)                                  | 3 (0.5)                    |
| Bilirubin conjugated increased                                                                 | 15 (2.5)                                  | 20 (3.3)                                  | 3 (0.5)                    |
| Blood creatine phosphokinase increased                                                         | 14 (2.3)                                  | 8 (1.3)                                   | 11 (1.8)                   |
| Blood lactate dehydrogenase increased                                                          | 6 (1.0)                                   | 15 (2.5)                                  | 6 (1.0)                    |
| Aspartate aminotransferase increased                                                           | 4 (0.7)                                   | 9 (1.5)                                   | 12 (2.0)                   |
| Treatment-related adverse events occurring in $\geq 2\%$ of patients in either group — no. (%) |                                           |                                           |                            |
| Headache                                                                                       | 4 (0.7)                                   | 13 (2.2)                                  | 2 (0.3)                    |
| High-density lipoprotein decreased                                                             | 111 (18.4)                                | 157 (26.2)                                | 9 (1.5)                    |
| Blood triglycerides increased                                                                  | 16 (2.6)                                  | 37 (6.2)                                  | 17 (2.8)                   |
| Blood bilirubin increased                                                                      | 17 (2.8)                                  | 35 (5.8)                                  | 3 (0.5)                    |
| Blood cholesterol decreased                                                                    | 8 (1.3)                                   | 12 (2.0)                                  | 1 (0.2)                    |

521 <sup>a</sup> Data for all patients who received at least one ensitrelvir or placebo dose are shown.522 <sup>b</sup> Both serious adverse events were judged as not treatment related and recovered with appropriate intervention.



523 <sup>c</sup> Among the adverse events leading to treatment discontinuation, mild eczema and mild vomiting in one patient each in the ensitrelvir 125-mg  
524 group, mild rash and moderate rash in one patient each in the ensitrelvir 250-mg group, and moderate hypoesthesia and mild muscular weakness  
525 in one patient in the placebo group were judged as treatment related by the investigator. All treatment-related adverse events leading to treatment  
526 discontinuation were deemed to be resolving or resolved after study discontinuation.

527
